# Supplementary material for: Bee Pollen and Bread as a Super-Food: A Comparative Review of Their Metabolome Composition and Quality Assessment in the Context of Best Recovery Conditions
Source: MDPI journal article supplement (doi:10.3390/molecules28020715), 2023-01-11
Supplement: s1 [file s1]

## Supplementary Materials

# Bee Pollen and Bread as a Super-Food: A Comparative Review of Their Metabolome Composition and Quality Assessment in the Context of Best Recovery Conditions

Mostafa H. Baky <sup>1</sup>, Mostafa B. Abouelela <sup>1</sup>, Kai Wang <sup>2,\*</sup> and Mohamed A. Farag <sup>3,\*</sup>

<sup>1</sup> Pharmacognosy Department, College of Pharmacy, Egyptian Russian University, Badr City P.O. Box 11829, Egypt

<sup>2</sup> Institute of Apicultural Research, Chinese Academy of Agricultural Sciences, Beijing P.O. Box 101101, China

<sup>3</sup> Pharmacognosy Department, College of Pharmacy, Cairo University, Kasr el Aini St., Cairo P.O. Box 11562, Egypt

\* Correspondence: kaiwang628@gmail.com (K.W.); mohamed.farag@pharma.cu.edu.eg (M.A.F.)

| Table S1. Flavonoids identified in bee bread and bee pollen |                 |                   |                      |                 |            |            |                      |                   |                  |                      |             |                   |            |      |
|-------------------------------------------------------------|-----------------|-------------------|----------------------|-----------------|------------|------------|----------------------|-------------------|------------------|----------------------|-------------|-------------------|------------|------|
| Sample/compounds                                            | Isorhamnetin    | Myricetin         | Quercetin            | Epicatechin     | Naringenin | Hesperitin | Kaempferol           | catechin          | Apigenin         | Luteolin             | Tyrosol     | Rutin             | Naringenin | Ref. |
| Bee pollen sample                                           | ---             | --                | 29.648 µg/g          | --              | 21.92 µg/g | 3.0 µg/g   | 7.8µg/g              | --                | --               | --                   | --          | --                | --         | [1]  |
| Commercial Bee pollen                                       | --              | --                | 22.02 mg/kg          | --              | --         | --         | --                   | 22.1 mg/kg        |                  | --                   | --          | --                | ----       | [2]  |
| Indian bee pollen                                           | --              | --                | 3.14–15.94 mg/100 g  | --              | --         | --         | 9.35 mg/100g         | 0.9–19.1 mg/100 g | 0.4–3.0 mg/100 g | 1.0–5.8 mg/100 g     | --          | 4.8–24.8 mg/100 g | --         | [3]  |
| Bee pollen samples                                          | --              | 20.4–244.7mg/100g | --                   | --              | --         | --         | --                   | --                | --               | --                   | --          | --                | --         | [4]  |
| Bee bread samples                                           | 1227.9 mg/100 g | --                | 381.1–3918.1 mg/100g | --              | --         | --         | 112.94–2681.2mg/100g | --                | --               | 21.9–3490.8 mg/100 g | --          | --                | --         |      |
| <i>Rhododendron ponticum</i> BP                             | --              | 3744.3 µg/100 g   | --                   | 1350.4 µg/100 g | --         | --         | --                   | 1207.0 µg/100     | --               | --                   | 1137.6 µg/1 | --                | --         | [5]  |

|                           |    |                  |                    |    |    |    |                 |    |    |    |      |                             |                      |     |
|---------------------------|----|------------------|--------------------|----|----|----|-----------------|----|----|----|------|-----------------------------|----------------------|-----|
|                           |    |                  |                    |    |    |    |                 | g  |    |    | 00 g |                             |                      |     |
| Mixture of pollen samples | -- | --               | 24.0–529.8<br>µg/g | -- | -- | -- | --              | -- | -- | -- | --   | 156.2<br>–<br>955.7<br>µg/g | 3.1–<br>43.6<br>µg/g | [6] |
| Mixture of pollen samples | -- | 2220.70<br>µg/kg | 7849.8<br>µg/kg    | -- | -- | -- | 9870.7µ<br>g/kg | -- | -- | -- | --   | 115,4<br>42.25<br>µg/k<br>g | --                   | [7] |

| Table S2. Phenolic acids reported in bee bread and bee pollen |                                         |                                |                                 |                              |                |                    |                       |                              |                           |                        |      |
|---------------------------------------------------------------|-----------------------------------------|--------------------------------|---------------------------------|------------------------------|----------------|--------------------|-----------------------|------------------------------|---------------------------|------------------------|------|
| Sample/ acids                                                 | Gall<br>c                               | Caffe<br>c                     | Ferul<br>c                      | o-, p-<br>coumaric           | Cinnami<br>c   | Protocatech<br>uic | Chlorogenic           | 2,5-<br>dihydroxyb<br>enzoic | 2-<br>Hydroxy<br>cinnamic | Ferulic                | Ref. |
| Bee pollen sample                                             | ---                                     | --                             | 149.10<br>4 µg/g                | 36.688 µg/g                  | 23.456<br>µg/g | --                 | --                    | --                           | --                        | --                     | [1]  |
| Commercial Bee<br>pollen                                      | --                                      | --                             | --                              | 11.62<br>mg/kg               | 3.70<br>mg/kg  | --                 | --                    | --                           | --                        | --                     | [2]  |
| Indian bee pollen                                             | --                                      |                                | --                              | --                           | --             | --                 | --                    | --                           | --                        | --                     | [3]  |
| Bee pollen samples                                            | 0.04-<br>3.14<br>mg/1<br>00g            | 12.46-<br>56.17<br>mg/10<br>0g | 23.23-<br>107.68<br>mg/10<br>0g | --                           | --             | --                 | --                    | --                           | --                        | --                     | [4]  |
| Bee bread samples                                             | 34.65<br>–<br>347.3<br>7<br>mg/1<br>00g | --                             | --                              | 28.70–<br>142.44<br>mg/100 g | --             | 166.61<br>mg/100g  | 3.89–36.09<br>mg/100g | 2.69–35.09<br>mg/100g        | --                        | --                     |      |
| Mixture of pollen<br>samples                                  | 3.0-<br>32.3<br>µg/g                    | 8.5-<br>20.6<br>µg/g           | --                              | --                           | --             | --                 | --                    | --                           | 43.4–<br>179.9<br>µg/g    | 14.6 -<br>68.6<br>µg/g | [6]  |

## Reference

1. Fanali, C.; Dugo, L.; Rocco, A. Nano-liquid chromatography in nutraceutical analysis: Determination of polyphenols in bee pollen. *Journal of Chromatography A* **2013**, *1313*, 270–274.
2. Toribio, L.; Arranz, S.; Ares, A. M.; Bernal, J. Polymeric stationary phases based on poly (butylene terephthalate) and poly (4-vinylpyridine) in the analysis of polyphenols using supercritical fluid chromatography. Application to bee pollen. *Journal of Chromatography A* **2018**, *1572*, 128–136.
3. Thakur, M.; Nanda, V. Screening of Indian bee pollen based on antioxidant properties and polyphenolic composition using UHPLC-DAD-MS/MS: A multivariate analysis and ANN based approach. *Food Research International* **2021**, *140*, 110041.
4. Bayram, N. E.; Gercek, Y. C.; Çelik, S.; Mayda, N.; Kostić, A. Ž.; Dramićanin, A. M.; Özkök, A. Phenolic and free amino acid profiles of bee bread and bee pollen with the same botanical origin—similarities and differences. *Arabian Journal of Chemistry* **2021**, *14*, 103004.
5. Ecem Bayram, N. Vitamin, mineral, polyphenol, amino acid profile of bee pollen from *Rhododendron ponticum* (source of “mad honey”): Nutritional and palynological approach. *Journal of Food Measurement and Characterization* **2021**, *15*, 2659–2666.
6. Kaškonienė, V.; Ruočkusienė, G.; Kaškonas, P.; Akuneca, I.; Maruška, A. Chemometric analysis of bee pollen based on volatile and phenolic compound compositions and antioxidant properties. *Food Analytical Methods* **2015**, *8*, 1150–1163.
7. Gercek, Y. C.; Celik, S.; Bayram, S. Screening of Plant Pollen Sources, Polyphenolic Compounds, Fatty Acids and Antioxidant/Antimicrobial Activity from Bee Pollen. *Molecules* **2022**, *27*, 117.
